# Supplementary material for: Quantifying the relative contribution of hydrogen bonding and hydrophobic environments, and coordinating groups, in the zinc(ii)–water acidity by synthetic modelling chemistry
Source: Royal Society of Chemistry journal article supplement (doi:10.1039/b402084g), 2004-01-01
Supplement: b402084g.doc [file b402084g.doc]

**Electronic Supplementary Information (ESI)**

Quantifying the relative contribution of hydrogen bonding and hydrophobic environments, and coordinating groups, in the zinc(II)-water acidity by synthetic modelling chemistry

Juan C. Mareque-Rivas,* Ravi Prabaharan and Simon Parsons

*School of Chemistry, The University of Edinburgh,*

*Joseph Black Building, King's Buildings,*

*West Mains Road, Edinburgh, EH9 3JJ, UK*

*Tel:44-(0)131-650-4761*

*Fax:44-(0)131-650-4743*

***To whom correspondence should be addressed. Email:juan.mareque@ed.ac.uk.

**
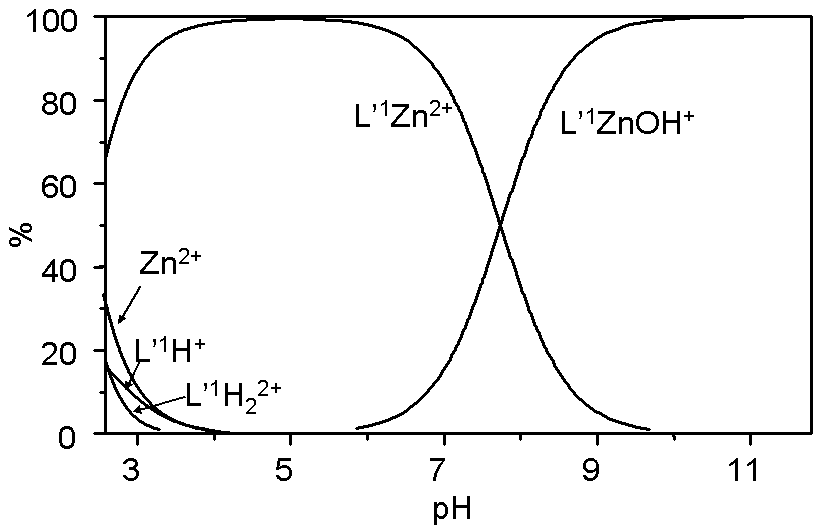
**

**Fig. S1**: Speciation diagram for a mixture of 1 mM **L’1** + 1 mM Zn2+ as a function of pH at 25 ºC with *I* = 0.1 (NaNO3).


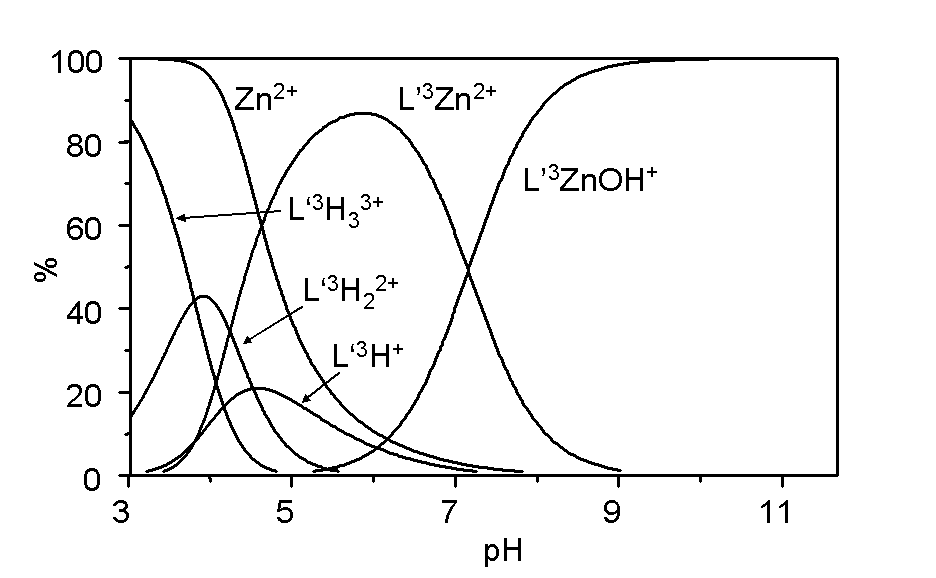


**Fig. S2**: Speciation diagram for a mixture of 1 mM **L’3** + 1 mM Zn2+ as a function of pH at 25 ºC with *I* = 0.1 (NaNO3).
